# Supplementary material for: The Role of Structural Variants in the Genetic Architecture of Parkinson’s Disease
Source: MDPI journal article supplement (doi:10.3390/ijms25094801), 2024-04-27
Supplement: s1 [file s1]

| Gene | Type of Structural Variant     | Method of Detection                                                                                      | Functional Effects                                                                                                                                                                               | References                               |
|------|--------------------------------|----------------------------------------------------------------------------------------------------------|--------------------------------------------------------------------------------------------------------------------------------------------------------------------------------------------------|------------------------------------------|
| SNCA | CNV: Triplication              | qPCR (detected), FISH (confirmed)                                                                        | NA                                                                                                                                                                                               | Singleton et al., 2003<br>PMID: 14593171 |
|      | CNV: Triplication              | Semiquantitative multiplex PCR (detected)                                                                | Doubling of SNCA expression (gene dosage increase), severe neuronal loss in hippocampal CA2/3, in the substantia nigra and locus coeruleus, and in the basal nucleus of Meynert                  | Farrer et al., 2004<br>PMID: 14755720    |
|      | CNV: Triplication, Duplication | qPCR (detected), microsatellite marker analysis (confirmed)                                              | NA                                                                                                                                                                                               | Fuchs et al., 2007<br>PMID: 17251522     |
|      | CNV: Triplication, Duplication | Semiquantitative multiplex PCR (detected), Affymetrix 250k SNP microarrays (determined size)             | NA                                                                                                                                                                                               | Ibáñez et al., 2009<br>PMID: 19139307    |
|      | CNV: Triplication              | Semiquantitative multiplex PCR (detected), MLPA (confirmed)                                              | NA                                                                                                                                                                                               | Sekine et al., 2010<br>PMID: 20818659    |
|      | CNV: Triplication              | MLPA (detected), qPCR (confirmed)                                                                        | NA                                                                                                                                                                                               | Keyser et al., 2010<br>PMID: 20013014    |
|      | CNV: Triplication              | MLPA (detected), Illumina HumanOmniExpress BeadChip array (confirmed copy number gain), FISH (confirmed) | Frontoparietal atrophy using brain magnetic resonance imaging (MRI) and striatal dopaminergic deficit using single-photon emission computed tomography-dopamine transporter scan (SPECT-DaTSCAN) | Olgiati et al., 2015<br>PMID: 26077166   |

|  |                   |                                                                                                                         |                                                                                                                                                                                                                                                                                                                               |                                                |
|--|-------------------|-------------------------------------------------------------------------------------------------------------------------|-------------------------------------------------------------------------------------------------------------------------------------------------------------------------------------------------------------------------------------------------------------------------------------------------------------------------------|------------------------------------------------|
|  | CNV: Triplication | MLPA (detected), high-density array comparative genomic hybridization (aCGH) (detected dosage), qPCR (confirmed dosage) | Frontotemporal and parietal degeneration using FDG-positron emission tomography (PET), cortical and subcortical atrophy in the temporoinsular and the frontal regions using MRI, and putamen degeneration using SPECT-DaTSCAN                                                                                                 | Ferese et al., 2015<br>PMID: 26635992          |
|  | CNV: Duplication  | Semiquantitative PCR (detected), FISH (confirmed)                                                                       | NA                                                                                                                                                                                                                                                                                                                            | Chartier-Harlin et al., 2004<br>PMID: 15451224 |
|  | CNV: Duplication  | Semiquantitative multiplex PCR (detected)                                                                               | NA                                                                                                                                                                                                                                                                                                                            | Ibáñez et al., 2004<br>PMID: 15451225          |
|  | CNV: Duplication  | Semiquantitative PCR (detected), FISH (confirmed)                                                                       | NA                                                                                                                                                                                                                                                                                                                            | Nishioka et al., 2006<br>PMID: 16358335        |
|  | CNV: Duplication  | Semiquantitative multiplex PCR (detected), FISH (confirmed)                                                             | Decreased uptake of [123I] FP-CIT detected by [123I] FP-CIT SPECT                                                                                                                                                                                                                                                             | Ahn et al., 2008<br>PMID: 17625105             |
|  | CNV: Duplication  | qPCR (detected), Affymetrix 250k SNP array (confirmed)                                                                  | Reduction of dopamine transporters in the anterior and posterior putamen and caudate using [11C]-CFT PET, reduction in dopamine D2 receptor density in the caudate using [11C]-RAC PET, reduction in glucose metabolism in the occipital lobe using FDG-PET, and olfactory dysfunction using the "Sniffin' Sticks" assessment | Nishioka et al., 2009<br>PMID: 19562770        |
|  | CNV: Duplication  | MLPA (detected), aCGH (copy number gain), SNP array (copy number gain homozygous), FISH (duplication on both alleles)   | Reduction in tracer uptake in the striatum using DaTSCAN                                                                                                                                                                                                                                                                      | Kojovic et al., 2012<br>PMID: 23208740         |

|      |                                          |                                                                                  |                                                                                                                                                                                        |                                        |
|------|------------------------------------------|----------------------------------------------------------------------------------|----------------------------------------------------------------------------------------------------------------------------------------------------------------------------------------|----------------------------------------|
|      | CNV: Duplication                         | Next-generation sequencing (NGS) (detected)                                      | Severe neuronal loss in the substantia nigra, the locus coeruleus, the dorsal motor nucleus of the vagus, the basal nucleus of Meynert, the amygdala, and the hippocampal CA2/3 region | Konno et al., 2015<br>PMID: 26350119   |
| PRKN | Deletion                                 | PCR (detected), southern blot (confirmed), reverse transcriptase PCR (confirmed) | NA                                                                                                                                                                                     | Kitada et al., 1998<br>PMID: 9560156   |
|      | Deletion                                 | PCR (detected)                                                                   | NA                                                                                                                                                                                     | Lucking et al., 1998<br>PMID: 9802278  |
|      | Deletion                                 | PCR (detected)                                                                   | NA                                                                                                                                                                                     | Abbas et al., 1999<br>PMID: 10072423   |
|      | Deletion, CNV: Duplication, Triplication | Semiquantitative PCR (detected)                                                  | NA                                                                                                                                                                                     | Lucking et al., 2000<br>PMID: 10824074 |
|      | Deletion                                 | PCR (detected), dye terminator cycle sequencing (confirmed)                      | Neuronal loss in the substantia nigra pars compacta and no Lewy bodies                                                                                                                 | Hayashi et al., 2000<br>PMID: 11009195 |
|      | Deletion, CNV: Duplication               | Quantitative duplex PCR (detected), southern blot (confirmed)                    | NA                                                                                                                                                                                     | Hedrich et al., 2001<br>PMID: 11487568 |
|      | Deletion, CNV: Duplication               | Quantitative duplex PCR (detected)                                               | NA                                                                                                                                                                                     | Hedrich et al., 2002<br>PMID: 11971093 |
|      | Deletion                                 | Dye terminator cycle sequencing (detected), qPCR (confirmed)                     | NA                                                                                                                                                                                     | Nichols et al., 2002<br>PMID: 12114481 |
|      | Deletion, CNV: Duplication               | Dye terminator cycle sequencing (detected), qPCR (confirmed)                     | NA                                                                                                                                                                                     | Foroud et al., 2003<br>PMID: 12629236  |
|      | Deletion, CNV: Duplication               | Dye terminator cycle sequencing (detected), qPCR (confirmed)                     | NA                                                                                                                                                                                     | Poorkaj et al., 2005                   |

|  |                               |                                                                                                                  |                                                                                                                                                                                                                                                                             |                                            |
|--|-------------------------------|------------------------------------------------------------------------------------------------------------------|-----------------------------------------------------------------------------------------------------------------------------------------------------------------------------------------------------------------------------------------------------------------------------|--------------------------------------------|
|  |                               |                                                                                                                  |                                                                                                                                                                                                                                                                             | PMID:<br>15725358                          |
|  | Deletion                      | Single-strand conformation polymorphism analysis (detected), quantitative duplex PCR (confirmed)                 | NA                                                                                                                                                                                                                                                                          | Hedrich et al., 2004b<br>PMID:<br>15390068 |
|  | Deletion                      | PCR (detected)                                                                                                   | Neuronal degeneration in the substantia nigra and the locus coeruleus, and alpha-synuclein and ubiquitin-positive inclusions in the neuropils of the pedunculopontine nucleus                                                                                               | Sasaki et al., 2004<br>PMID:<br>15326242   |
|  | Deletion, CNV: Duplication    | Denaturing high performance liquid chromatography (DHPLC) (detected), semiquantitative multiplex PCR (confirmed) | NA                                                                                                                                                                                                                                                                          | Lesage et al., 2008<br>PMID:<br>17766365   |
|  | Deletion, CNV: Multiplication | MLPA (detected), qPCR (confirmed)                                                                                | NA                                                                                                                                                                                                                                                                          | Kay et al., 2010<br>PMID:<br>20876472      |
|  | Deletion, CNV: Duplication    | Dye terminator cycle sequencing (detected), MLPA (confirmed)                                                     | NA                                                                                                                                                                                                                                                                          | Kilarski et al., 2012<br>PMID:<br>22956510 |
|  | Deletion                      | Not specified                                                                                                    | Neuronal loss in the substantia nigra and the locus coeruleus, and Lewy bodies found in the substantia nigra, locus coeruleus, dorsal motor nucleus of the vagus, the basal nucleus of Meynert, the amygdaloid nucleus, and the sympathetic nerve bundles in the myocardium | Miyakawa et al., 2013<br>PMID:<br>23401296 |
|  | Deletion                      | MLPA (detected), qPCR (confirmed)                                                                                | NA                                                                                                                                                                                                                                                                          | Taghavi et al., 2018<br>PMID:<br>28502045  |
|  | Deletion, CNV: Duplication    | Sanger sequencing (detected), MLPA (confirmed)                                                                   | NA                                                                                                                                                                                                                                                                          | Milanowski et al. 2021                     |

|       |                            |                                                                    |    |                                            |
|-------|----------------------------|--------------------------------------------------------------------|----|--------------------------------------------|
|       |                            |                                                                    |    | PMID:<br>33845304                          |
|       | Deletion                   | WGS (detected), MLPA (confirmed)                                   | NA | Zhu et al., 2022<br>PMID:<br>35640906      |
|       | Deletion, CNV: Duplication | Sanger sequencing (detected), MLPA (confirmed)                     | NA | Yoshino et al., 2022<br>PMID:<br>35123805  |
|       | Deletion, Inversion        | MLPA (detected), ONT long-read sequencing (confirmed)              | NA | Daida et al., 2023<br>PMID:<br>37790330    |
| PARK7 | Deletion                   | Duplex PCR (detected), dye terminator cycle sequencing (confirmed) | NA | Bonifati et al., 2003<br>PMID:<br>14598065 |
|       | Deletion                   | Quantitative duplex PCR (detected)                                 | NA | Hedrich et al., 2004a<br>PMID:<br>14872018 |
|       | Deletion                   | DHPLC (detected), quantitative duplex PCR (confirmed)              | NA | Djarmati et al., 2004<br>PMID:<br>15108293 |
|       | CNV: Duplication           | Dye terminator cycle sequencing (detected), MLPA (confirmed)       | NA | Macedo et al., 2009<br>PMID:<br>18973254   |
|       | Deletion                   | qPCR (detected)                                                    | NA | Guo et al., 2010<br>PMID:<br>20146068      |
|       | Deletion                   | MLPA (detected), qPCR (confirmed)                                  | NA | Darvish et al., 2013<br>PMID:<br>23880019  |
|       | Deletion                   | NGS (detected), qPCR (confirmed)                                   | NA | Spataro et al., 2017<br>PMID:<br>28124432  |
|       | Deletion                   | Whole exome sequencing (detected), MLPA (confirmed)                | NA | Guler et al., 2021<br>PMID:<br>34605055    |
| PINK1 | Deletion                   | PCR (detected), dye terminator cycle sequencing (confirmed)        | NA | Li et al., 2005<br>PMID:<br>15955953       |

|  |                                  |                                                              |    |                                                 |
|--|----------------------------------|--------------------------------------------------------------|----|-------------------------------------------------|
|  | Deletion                         | Dye terminator cycle sequencing (detected), qPCR (confirmed) | NA | Marongiu et al., 2007<br>PMID: 17154281         |
|  | Deletion, Insertion, duplication | MLPA (detected), dye terminator cycle sequencing (confirmed) | NA | Cazeneuve et al., 2009<br>PMID: 19214605        |
|  | Deletion                         | MLPA (detected), qPCR (confirmed)                            | NA | Darvish et al., 2013<br>PMID: 23880019          |
|  | Deletion, CNV: Duplication       | MLPA (detected), qPCR (confirmed)                            | NA | Monroy-Jaramillo et al., 2014<br>PMID: 24677602 |

**Supplementary Table S1.** SVs identified in PD genes *SNCA*, *PRKN*, *PARK7*, and *PINK1*.
